# Supplementary material for: The Relationship between miR-5682 and Nutritional Status of Radiotherapy-Treated Male Laryngeal Cancer Patients
Source: MDPI journal article supplement (doi:10.3390/genes15050556), 2024-04-27
Supplement: s1 [file s1]

**Table S1.** Differences in miR-5682 expression among patients with different clinical-demographic features

| Factor              |            | Relative expression of miRNA |          |
|---------------------|------------|------------------------------|----------|
|                     |            | Median (IQR)                 | <i>p</i> |
| Age (years)         | > 65       | 1.37 (0.80-4.24)             | 0.576    |
|                     | ≤ 65       | 0.39 (0.06-1.49)             |          |
| Disease stage (TNM) | III        | 1.27 (0.22-2.34)             | 0.081    |
|                     | IVA-IVC    | 1.49 (0.52-4.67)             |          |
| T stage             | T1-3       | 1.27 (0.24-2.74)             | 0.568    |
|                     | T4         | 1.49 (0.39-4.41)             |          |
| N stage             | N0         | 1.27 (0.24-3.39)             | 0.133    |
|                     | N1-3       | 4.41 (-)                     |          |
| M stage             | M0         | 1.27 (0.24-3.39)             | 0.185    |
|                     | M1         | 4.24 (-)                     |          |
| Performance status  | ≤1         | 1.08 (0.24-2.74)             | 0.015*   |
|                     | >1         | 5.94 (4.24-7.65)             |          |
| Alcohol consumption | Yes        | 1.46 (0.45-3.49)             | 0.466    |
|                     | No         | 1.08 (0.14-4.03)             |          |
| Smoking status      | Smoker     | 1.37 (0.52-3.39)             | 0.120    |
|                     | Non-smoker | 0.80 (0.03-4.24)             |          |

\* - statistically significant results

Abbreviations: IQR - interquartile range; M - metastatic spread; N - lymph node involvement; T - tumor site and size.

**Table S2.** Correlation between demographic, clinical and nutritional variables and the relative expression of miR-5682

| Factor                         | miR-5682    |          |
|--------------------------------|-------------|----------|
|                                | Univariable |          |
|                                | rho         | <i>p</i> |
| Age [years]                    | 0.374       | 0.379    |
| T stage                        | 0.078       | 0.566    |
| N stage                        | 0.137       | 0.314    |
| M stage                        | 0.133       | 0.328    |
| Disease stage (TNM)            | 0.235       | 0.081    |
| Weight I [kg]                  | -0.147      | 0.278    |
| Weight IV [kg]                 | -0.224      | 0.096    |
| Weight VII [kg]                | -0.254      | 0.058    |
| BMI I [kg/m <sup>2</sup> ]     | -0.270      | 0.044*   |
| BMI IV [kg/m <sup>2</sup> ]    | -0.331      | 0.012*   |
| BMI VII [kg/m <sup>2</sup> ]   | -0.337      | 0.011*   |
| FM I [kg]                      | -0.201      | 0.136    |
| FM IV [kg]                     | -0.357      | 0.015*   |
| FM VII [kg]                    | -0.058      | 0.700    |
| FM I [%]                       | -0.197      | 0.145    |
| FM IV [%]                      | -0.241      | 0.106    |
| FM VII [%]                     | 0.147       | 0.328    |
| FFM I [kg]                     | -0.061      | 0.656    |
| FFM IV [kg]                    | -0.185      | 0.218    |
| FFM VII [kg]                   | -0.335      | 0.022*   |
| FFMI I [%]                     | 0.208       | 0.124    |
| FFMIV [%]                      | 0.235       | 0.115    |
| FFMVII [%]                     | -0.140      | 0.352    |
| FFMI I [kg/m <sup>2</sup> ]    | 0.051       | 0.715    |
| FFMI IV [kg/m <sup>2</sup> ]   | -0.289      | 0.051    |
| FFMI VII [kg/m <sup>2</sup> ]  | -0.183      | 0.222    |
| nFFMI I [kg/m <sup>2</sup> ]   | -0.008      | 0.951    |
| nFFMI IV [kg/m <sup>2</sup> ]  | -0.258      | 0.083    |
| nFFMI VII [kg/m <sup>2</sup> ] | -0.440      | 0.002*   |
| TP I [g/L]                     | 0.042       | 0.759    |
| TP IV [g/L]                    | -0.132      | 0.359    |
| TP VII [g/L]                   | -0.333      | 0.018*   |

|                                       |        |        |
|---------------------------------------|--------|--------|
| Albumin I [g/dL]                      | -0.153 | 0.261  |
| Albumin IV [g/dL]                     | -0.140 | 0.330  |
| Albumin VII [g/dL]                    | -0.442 | 0.001* |
| Prealbumin [mmol/L]                   | -0.130 | 0.340  |
| Transferrin [g/L]                     | -0.053 | 0.699  |
| CRP [mg/L]                            | 0.005  | 0.969  |
| NRI                                   | -0.073 | 0.591  |
| Duration of nutritional support[days] | -0.500 | 0.312  |
| NRS-2002                              | -0.139 | 0.305  |
| SGA                                   | 0.268  | 0.045* |

\*—statistically significant results

Abbreviations: BMI—body mass index; CRP—C-reactive protein; FFM—fat free mass; FFMI—fat-free mass index; FM—fat mass; M—metastatic spread; N—lymph node involvement; nFFMI—normalized fat-free mass index; NRI—nutrition risk index; NRS-2002—Nutritional Risk Screening 2002; SGA—subjective global assessment; T—tumor site and size and TNM—tumor, node, and metastasis staging.

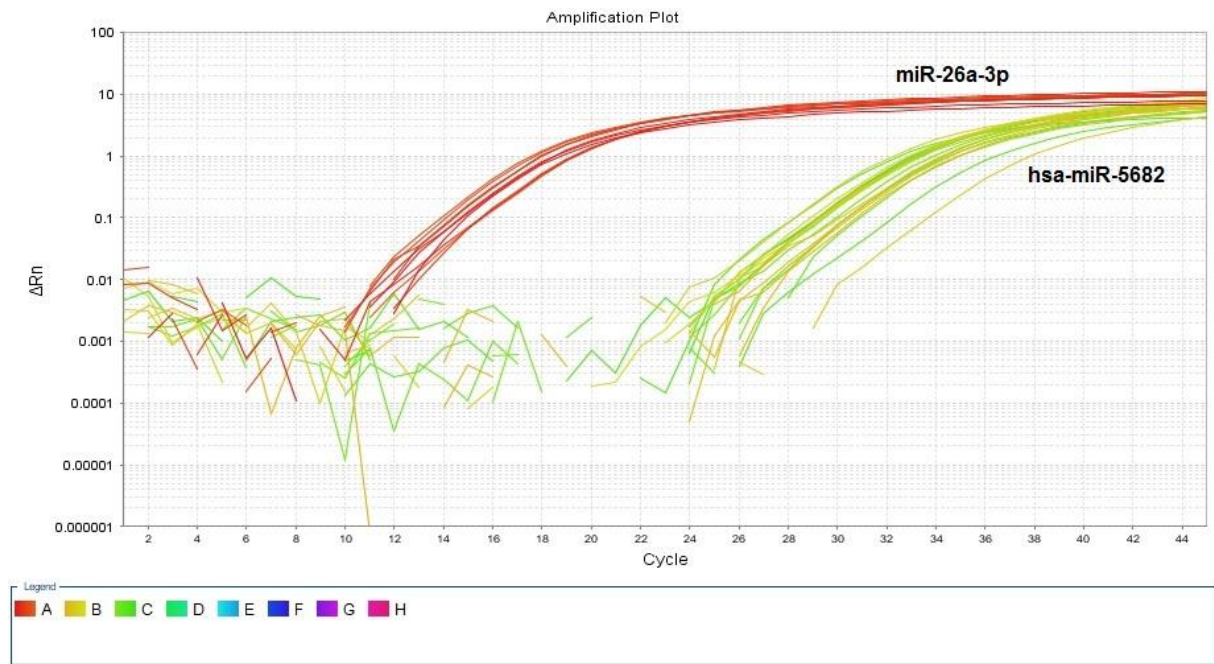

**Figure S1.** Ct values of internal control (miR-26-3p) and miR-5682 in studied patients.
